# Supplementary material for: Identification, Characterization and Functional Analysis of C-Class Genes Associated with Double Flower Trait in Carnation (Dianthus caryphyllus L.)
Source: PubMed Central journal article supplement (PMC7020439; doi:10.3390/plants9010087), 2020-01-10
Supplement: plants-09-00087-s001.pdf [file plants-09-00087-s001.pdf]

**Supplementary Material**

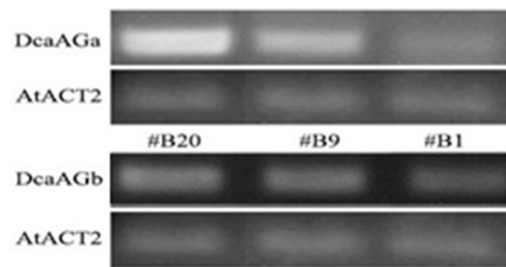

**Figure S1.** Semi-quantitative PCR analysis of two *DcaAG* genes in different transgenic *Arabidopsis* lines. Both *DcaAG* genes were found to express in transgenic plants. #B20, #B9, and #B1 represent the transgenic *Arabidopsis* plant with severe, moderate, and weak phenotypic variation, respectively. *AtACT2* was used as reference gene.

**Table S1:** The sequences of primers used for cloning *DcaAG* genes.

| Gene name     | Oligo Name       | Primer Sequence (5'-3')     |
|---------------|------------------|-----------------------------|
| <i>DcaAGa</i> | <i>DcaAGa</i> -F | ATGGAATTTTCAAGCCAAATAACTAGG |
|               | <i>DcaAGa</i> -R | TCAAACAAGTTGAAGAGGTGTTTGG   |
| <i>DcaAGb</i> | <i>DcaAGb</i> -F | ATGGAGTTTTCAAGCCAAATTAC     |
|               | <i>DcaAGb</i> -R | TTACACAAGTTGGAGAGGAGTTT     |

**Table S2:** Protein sequences used for phylogenetic analysis.

| Gene         | Accession Number | Species                          | Protein Sequence                                                                                                                                                                                                                                                             |
|--------------|------------------|----------------------------------|------------------------------------------------------------------------------------------------------------------------------------------------------------------------------------------------------------------------------------------------------------------------------|
| <i>EcAG1</i> | DQ088996         | <i>Eschscholtzia californica</i> | TDFQSQVTESSRRKMGRGKIEIKRIENTTNRQVTFCK<br>RRNGLLKKAYELSVLCDAEVALIVFSTRGRLYEYANNS<br>VKSTIERYKKT CADPNSACASEANTQFYQQEATKLR<br>QQIGILQNSNRNLMGEAISTMSVKELKQLENRLEKGIS<br>RIRSKKNELLF AEIEYMQKREIDLQNDNMYLRAKIAD<br>NERAQQQMSLMPGNEYEGMTSSGYDSRNFLQVNLLQ<br>SSSQHYSHQEQTTLQLG    |
| <i>EcAG2</i> | DQ088997         | <i>Eschscholtzia californica</i> | TDFPNQEREISSGRKMGRGKIEIKKIENNTNRQVTFCKR<br>RNGLLKKAYELSVLCDAEVALVVFNSNRGRLYEYANNS<br>VRSTIERYKKT CADPNSSSCSSEANIQFFQQEASKLRQQ<br>IAILQNSNRHLMGESLSSMNVKELKQLETRLEKGISRIR<br>SKKNELLF AEIELMQKREIDLQNHNMYSKIAEKERA<br>EQHMRLTPGNEYNDMISRNFQVNFQSSNHQYSHQ<br>EQTSLQLG          |
| <i>AmFAR</i> | AJ239057         | <i>Antirrhinum majus</i>         | MASLSDQSTEVSPERKIGRGKIEIKRIENKTNQQVTFCK<br>RRNGLLKKAYELSVLCDAEVALVVFSSRGRLYEYANN<br>SVKATIDRYKKASSDSSLNGSISEANTQYYQQEASKLR<br>AQISNLQNQRNMLGESLGALSLRELKNLESRVERGIS<br>RIRSKKNELLF AEIEYMQKREIDLHNNQYLRAKIAE<br>SERVQGGHMLMPGGSSGYEQLVETQPF DARNYLQV<br>NGLQPNNDYPRQDQLPLQLV |
| <i>AmPLE</i> | S53900           | <i>Antirrhinum majus</i>         | MEFPNQDSESLRKNRGRGKIEIKRIENITNRQVTFCKRR<br>NGLLKKAYELSVLCDAEVALVVFSSRGRLYEYANNSV<br>RATIERYKKASADSSNSVSTSEANTQFYQQEANKLRRQ<br>IREIQTSNRQMLGEGVSNMALKDLKSTEAKVEK AISRI<br>RSKKNELLF AEIEHMQKRELELHNANMFLRAKIAEGE                                                              |

|               |          |                                |                                                                                                                                                                                                                                                                                                                                   |
|---------------|----------|--------------------------------|-----------------------------------------------------------------------------------------------------------------------------------------------------------------------------------------------------------------------------------------------------------------------------------------------------------------------------------|
|               |          |                                | RAQQQMNLMPGSDYQPMTSQSYDVRNFLPMNLMEP<br>NQQQYSRHDQTALQLV                                                                                                                                                                                                                                                                           |
| <i>AtAG</i>   | X53579   | <i>Arabidopsis thaliana</i>    | TAYQSELGGD SSPLRKSGRG KIEIKRIENT<br>TNRQVTFCKR RNGLLKKAYELSVLCDAEVA<br>LIVFSSRGRL YEYSNNSVKG TIERYKKAIS<br>DNSNTGSVAEINAQYYQQES AKLRQQIISI<br>QNSNRQLMGE TIGSMSPKEL<br>RNLEGRLETSITRIRSKKNE LLFSEIDYMQ<br>KREVDLHNDN QILRAKIAEN ERNNPSISLM<br>PGGSNYEQLM PPPQTQSQPF DSRNYFQVAA<br>LQPNNHHYSS AGRQDQTALQLV                         |
| <i>AtSHP1</i> | M55550   | <i>Arabidopsis thaliana</i>    | MEEGGSSHDA ESSKKLGRGK IEIKRIENTT<br>NRQVTFCKRR NGLLKKAYELSVLCDAEVAL<br>VIFSTRGRLY EYANNSFIYL LLEKKKKKKK<br>KKNLWIYSSHVVRGTIERKY KACSDAVNPP<br>SVTEANTQYY QEASKLRRQ<br>IRDIQNSNRHIVGESLGLSN FKELKNLEGR<br>LEKGISRVRS KKNELLVAEI EYMQKREMEL<br>QHNNMYLRK IAEGARLNPD QQESSVIQGT<br>TVYESGVSSH DQSQHYNRNYIPVNLLPEPNQ<br>QFSGDQPPL QLV |
| <i>AtSHP2</i> | M55553   | <i>Arabidopsis thaliana</i>    | MEGGASNEVA ESSKKIGRGK IEIKRIENTT<br>NRQVTFCKRR NGLLKKAYELSVLCDAEVAL<br>VIFSTRGRLY EYANNSVRGT IERYKKAIS<br>AVNPPTITEANTQYYQQEAS KLRRQIRDIQ<br>NLNRHILGES LGSLNFKELK<br>NLESRLKGISRVRSKKHEM LVAEIEYMQK<br>RVKEIELQND NMYLRSKITE RTGLQQQESS                                                                                          |
| <i>NbAG</i>   | JQ699177 | <i>Nicotiana tabacum</i>       | MEFQSDLTREISPQRKLGKIEIKRIENTTNRQVTFCK<br>RRNGLLKKAYELSVLCDAEVALIVFSSRGRLYEYANNS<br>VKETIERYKKACSDSSNTDSISEANAQYYQQEASKLRA<br>QIGNLQNKNRNMLGECLAALSRLDKNLEQNIKGIS<br>KIRSKKNELFAEIEYMQKREIDLHNNNQYLRAKIAET<br>ERAQQQQQQMNLMPGSSSYELVHPPQQFDTRNYLQ<br>VNLQTNNDHYTRQDQPSLQLV                                                         |
| <i>NbSHP</i>  | JQ699178 | <i>Nicotiana tabacum</i>       | MEFPNEEFESSNSQRKSGRGKIEIKRIENTTNRQVTFCK<br>RRNGLLKKAYELSVLCDAEVALIVFSSRGRL<br>YEYANNSVRATIDRYKKHHADSTSQGSVSEANTQYYQ<br>QEAAKLRRQIRDIQTYNRQIVGEALSSLSRDL<br>KNLEGKLEKAIGRVRSKKNELLFSEIEVMQKREIEMQN<br>ANMYLRAKIAEVERAQQQMNLMPGGSEYSHHQ<br>QQPMSTSQNYNDARNFLPVNLLPEPNPHYSRHDDQTA<br>LQLV                                            |
| <i>TAG1</i>   | L26295   | <i>Lycopersicon esculentum</i> | MDFQSDLTREISPQRKLGKIEIKRIENTTNRQVTFCK<br>RRNGLLKKAYELSVLCDAEVALVVFNSNRGRLYEYANN<br>SVKATIERYKKACSDSSNTGSVSEANAQYYQQEASKLR<br>AQIGNLMNQNRNMMGEALAGMKLKLKLNLEQRIEK<br>GISKIRSKKNELFAEIEYMQKREVDLHNNNQYLRAKI<br>AETERAQHQHQMMNLMPGSSSYHEL VPPPQQFDTR<br>NYLQVNLQTNNHYPQDQPPQLV                                                       |
| <i>TAGL1</i>  | AY098735 | <i>Lycopersicon esculentum</i> | MVFPINQELLVDESSQLRKTSGGTGGGGRGKIEIKRIE<br>NTTNRQVTFCKRRNGLLKKAYELSVLCDAEVLIVFSS<br>RGRLYEYANNSVRATIDRYKKHHADSTSTGSVSEANT<br>QYYQQEASKLRRQIRDIQTYNRQIVGEALGSLSPRDLK<br>NLEGKLEKAIGRVRSKKNELLFSEIELMQKREIELQNA<br>NMYLRAKIAEVERAQEQMNLMPGGGGGGGGGGGG<br>GSDHQYHHQPNYEDARNNSLPVNLLPEPNPHYSRRDN<br>GDQTPLQLV                          |

|                        |        |                              |                                                                                                                                                                                                                                                                                                |
|------------------------|--------|------------------------------|------------------------------------------------------------------------------------------------------------------------------------------------------------------------------------------------------------------------------------------------------------------------------------------------|
| PMADS3                 | X72912 | <i>Petunia hybrid</i>        | MEFQSDLTREISPORLGRGKIEIKRIENTTNRQVTFCK<br>RRNGLLKKAYELSVLCDAEVALIVFSSRGRLEYEYANNS<br>VKATIERYKKACSDSNTGSIAEANAQYYQQEASKLR<br>AQIGNLQNRNRLGSLAALNLRDLRNLEQKIEKGI<br>SKIRAKKNELLFAEIEYMQKREIDLHNNNQYLRAKIAE<br>TERSQQMNLMPGSSSYDLVPPQQSFDARNYLQVNGL<br>QTNNHYPRQDQPPLQLV                         |
| FBP6                   | X68675 | <i>Petunia hybrid</i>        | MVFPNQEFSSSSQRKSGRGKIEIKRIENTTNRQVTFCK<br>RRNGLLKKAYELSVLCDAEVALIVFSSRGRLEYEYANNS<br>VRATIDRYKHHADSTSTGSVSEANTQYYQQEAAKLR<br>RQIRDIQTYNRQIVGEALSSLSRGLKNLEKLEKAIGR<br>VRSKKNELLFSEIELMQKREIEMQNANMYLRAKIAEV<br>ERATQQMNLMHGGGSEYQQQPMSSSQPYDARNFLP<br>VNLEPNPHYSRODQTALQLV                     |
| DcaAGa                 |        | <i>Dianthus caryophyllus</i> | MEFSSQITREEGSPSSQRKLGKIEIKRIENTTNRQVTF<br>CKRRNGLLKKAYELSVLCDAEVALIVFSSRGRLEYEYAN<br>HSVKGTIERYKKACSDSTGAGSVAEANAQYYQQEAA<br>KLRGQIRTTDSNRLSRQLMGEGLSDLSMKELKNLES<br>KLEKISRIRSKKNELLFAEIEFMQKREIDLHNNHQFLR<br>AKIAENERAQQSMRLMPGGSSEYELAPPPQSFDSRNYF<br>QVNALQPNEHYSRODQTPLQLV                |
| DcaAGb                 |        | <i>Dianthus caryophyllus</i> | MEFSSQITREEGSPSSQRKLGKIEIKRIENTTNRQVTF<br>CKRRNGLLKKAYELSVLCDAEVALIVFSTRGRLEYEYAN<br>HSVKGTIERYKKTCSDTSTGSVAEANAQYYQQESAKL<br>RSQIRTMTESNRSLSRHMMGEGLTGLNMKELKNLETK<br>LEKISRIRSKKNELLFAEIEFMQKREVDLHNNNQLLR<br>AKIAENERAQQSMMLMPGGGDYELAPPPQSFDSRNYF<br>QVNALQPNEQYSCQDQTPLQLV                |
| Bv8_18831<br>0_mhzu.t1 |        | <i>Beta vulgaris</i>         | MEGSPSSQRKMGRGKIEIKRIENTTNRQVTFCKRRNGL<br>LKKAYELSVLCDAEVALIVFSSRGRLEYEYANHSVKGTI<br>DRYKKAQSDQSGAGSVAEANAQYYQQEAAKLRNQIR<br>TATENRLLSRHMMGEGLSSLSMKELKNLETKLERGIS<br>RIRSKKNELLFAEIEFMQKREIELHNNNQFLRARISENE<br>RAQQSMLMPGGSDYDLVPSQSFDSRNYFQVNALQPS<br>SQYARQDQTPLQLV                        |
| Spo09086               |        | <i>Spinacia oleracea</i>     | MLTKDVKGTIDRYKACSDQTGAGSVAEANAQYYQ<br>QEA AKLRNQIR TATENNR TNYLKWNRLSRHMMG<br>EGLSSLSMKELKNLETKLEKISRIRSKKNELLFAEIEFM<br>QKREIELHNNNQFLRARISENERAQQSMMLPPGGSD<br>YDLVPSQSFDSRNYFQVNALQPNTTVSNLSTCAWRRK<br>HKPSFATGDQVVAGAWCLVPGAWCLVPGAWWWFL<br>NCHFAVVDVT                                     |
| AUR62035<br>850-RA     |        | <i>Chenopodium quinoa</i>    | MEFPTQVMEEGSPSSQRKMGRGKIEIKRIENTTNRQVT<br>FCKRRNGLLKKAYELSVLCDAEVALIVFSSRGRLEYEY<br>NHSVKGTIDRYKACSDQTGAGSVAEANAQNGKINV<br>TEFPRPRNVIWYQQEAAKLRQSIKSTNTNRHMMG<br>EGLSSLSMKELKNLESKLEKGINRIRSKKNELLFAEIEF<br>MQKREIELHNNNQFLRARISENERAQQSMMLMPGGS<br>DYDLVPSQSFDSRNYFQVNALQPNNQYARQDQTPLQ<br>LV |
| AUR62027<br>653-RA     |        | <i>Chenopodium quinoa</i>    | MEFPTQVMEEGSPSSQRKMGRGKIEIKRIENTTNRQVT<br>FCKRRNGLLKKAYELSVLCDAEVALIVFSSRGRLEYEY<br>NHSVKGTIDRYKACSDQTGAGSVAEANAQYYQQEA<br>AKLRGQIKTATENNRHMMGEGLSSLSMKELKNLETK<br>LEKGINRIRSKKNELLFAEIEFMQKREIELHNNNQFLR<br>ARISENERAQQSMMLMPGGSDYDLVPSQSFDSRNYFQI<br>ELAGAESDQVNSLMNGI                       |

|                |              |                             |                                                                                                                                                                                                                                                                                                  |
|----------------|--------------|-----------------------------|--------------------------------------------------------------------------------------------------------------------------------------------------------------------------------------------------------------------------------------------------------------------------------------------------|
| <i>VvAG</i>    | NM_001281168 | <i>Vitis vinifera</i>       | MGRGKIEIKRIENTTNRQVTFCKRRNGLLKKAYELSVL<br>CDAEVALIVFSSRGRLYEYANNSVKSTIERYKKASADSS<br>NTGSVSEANAQFYQQESSKLHQQIRNLQNSNRHMLG<br>ESLGSLSNFKDLKSLEIRLEKGISRIRSKKNELFFAEIEM<br>QKREIDLHNDNQYLRARIAENERNEQQMSLMPGGAN<br>YELMPSQQFDSRNYFQLNGLQPNQYSYRQDQPALQLV                                           |
| <i>VvMADS1</i> | NP_001268105 | <i>Vitis vinifera</i>       | MGRGKIEIKRIENTTNRQVTFCKRRNGLLKKAYELSVL<br>CDAEVALIVFSSRGRLYEYANNSVRTTIERYKKVCSDDS<br>NTGSVSEANAQFYQQEASKLRQIRDIONLRHILGE<br>ALSSLNFKELKNLETRLEKGISRIRSKKNELFFAEIEM<br>QKREIELQNSNLFRAQIAENERAQQQMNLMPSGSQY<br>ESVPQQPYDSQNLLPVNLLDPNHHSRHDQDALQLV                                                |
| <i>KjAG</i>    | AMQ23646     | <i>Kerria japonica</i>      | MAYENKSMMAIDSPQRKLRGKIEIKRIENTTNRQVT<br>FCKRRNGLLKKAYELSVLCDAEVALIVFSNRGRLYEYA<br>NNSVRATVERYKKACADTSNNGSVSEASTQYYQQEA<br>AKLRAQIGNLQNSSRHMLGESLSSMTMKDLKSLEGKL<br>EKGISRIRSKKNELFFTEIEMQKREIDLHNNNQLLRA<br>KIAENERSQQNINVMAAGGGNYEIMQSQPYDSRNYF<br>QVSALQPNHOYNPRQDQIALQLV                      |
| <i>AtSTK</i>   | NP_001329612 | <i>Arabidopsis thaliana</i> | MMGRGKIEIKRIENSTNRQVTFCKRRNGLLKKAYELSV<br>LCDAEVALIVFSTRGRLYEYANNNIRSTIERYKKACSDS<br>TNTSTVQEINAAYYQQESAKLRQQIQTIQNSNRNLGM<br>DSLSSLSVKELKQVENRLEKAISRIRSKKHELLLVEIENA<br>QKREIELDNENIYLRTKVAEVERYQQHHHQMVSGSEI<br>NAIEALASRNYFAHSIMTAGSGSGNGGSYSDPDKKILH<br>LG                                  |
| <i>FBP11</i>   | CAA57445     | <i>Petunia hybrid</i>       | MGRGKIEIKRIENNTNRQVTFCKRRNGLLKKAYELSVL<br>CDAEIALIVFSTRGRVYEYANNNIKGTIERYKKATAETS<br>NACTTQELNAQFYQQESKLRQQIQQLLQNTNRHLVG<br>EGLSALNVRELKQLENRLERGITRIRSKKHEMILAETE<br>NLQKREIQLEQENTFLRSKIAENERLQELSMMPATGQE<br>YNAFQQYFARNMLQLNMMEGGVPSPYDPLPAHDKKS<br>LQLE                                    |
| <i>CUM1</i>    | AAC08528     | <i>Cucumis sativus</i>      | MSKHYSPLTRMIKEEGKGLQIKGMFQNQEEKMSDS<br>PQRKMGRGKIEIKRIENTTNRQVTFCKRRNGLLKKAY<br>ELSVLCDAEVALIVFSSRGRLYEYANNSVKATIDRYKK<br>ASSDSSNTGSTSEANTQFYQQEAAKLRVQIGNLQNSN<br>RNMLGESLSSLTAKDLKGLKLETKLEKGISRIRSKKNELFF<br>AEIEMRKRREIDLHNNNQMLRAKIAESERNVNMGG<br>EFELMQSHPYDPRDFQVNGLQHNHQYPRQDNMAL<br>QLV |
| <i>CUM10</i>   | AAC08529     | <i>Cucumis sativus</i>      | MGRGKIEIKRIENTTNRQVTFCKRRNGLLKKAYELSVL<br>CDAEVALIVFSSRGRLYEYSNNSIKTTIERYKKACSDSS<br>ATSSVTELNTQYYQQESAKLRQQIQMLQNSNSNLVRH<br>LMGDSLSALTVKELKQLENRLERGITRIRSKKHEMLLA<br>EIEYLQKREIELENENVCIRTKIAEVERVQQANMVSGQ<br>ELNAIQALANSRNFSPNIMEPAGPVSYSHQDKKMLH<br>LG                                     |
| <i>GhMADS3</i> | XP_016711294 | <i>Gossypium hirsutum</i>   | MVYPNESLEDSPQKKMGRGKIEIKRIENTTNRQVTFCK<br>RRNGLLKKAYELSVLCDAEVALVVFSSRGRLYEYANN<br>SVKATIERYKKASDSSNTGSVAEVNAQFYQQEADKLR<br>NQIRNLQANRHMMLGESIGLPMKELKSLESRLEKGIS<br>RIRSKKNELFFAEIEMQKREIDLHNNNQLLRAKIAEN<br>ERKQQSMNLMPPGSSANFEALHSQPYDSRNYFQVDA<br>LQPATNYNPNQLQDQIALQLV                      |
| <i>GhMADS5</i> | ABM69043     | <i>Gossypium hirsutum</i>   | MGRGKIEIKRIENTTNRQVTFCKRRNGLLKKAYELSVL<br>CDAEVALIVFSTRGRLYEYSNNSNIRSTIERYKKACSGTS<br>NTNTVTEINAQYYQQESAKLRQQIQMLQNSSRHMLG                                                                                                                                                                       |

|                |          |                           |                                                                                                                                                                                                                                                                                      |
|----------------|----------|---------------------------|--------------------------------------------------------------------------------------------------------------------------------------------------------------------------------------------------------------------------------------------------------------------------------------|
|                |          |                           | DSLSSLTVKELKQLENRLERGITRIRSKKHEMLLAEIEYF<br>QKREVELENESVCLRAKIAEIERVEEANMVTGAELNAI<br>QALASRNFFTPNVIERGTPPYSHHDKKILHLG                                                                                                                                                               |
| <i>GhMADS7</i> | ABM69045 | <i>Gossypium hirsutum</i> | MEFPNLDPESSSQKKMGRGKIEIKRIENTTNRQVTFCK<br>RRNGLLKKAYELSVLCDAEVALIVFSSRGRLYEYANNS<br>VRATIERYKKACSDATTPGSVAEANIQFYQQEATKLR<br>QIRDVQNMNRHILGEALSSLTFKELKNLEGRLEKGCIR<br>IRSKKNELLFAEIGFMQKREVELQNDNMYLRAKIAEN<br>ERAQQQSNQLMQAASSYNRNFLPVNLLSPNNDYSN<br>QDQTPLQLV                     |
| <i>GsAG1</i>   | LC022775 | <i>Gentiana scabra</i>    | MDYPPRQEFDSSSRKSGRGKIEIKRIENATNQQVTFCK<br>RRSGILKKAYELSVLCDAEVALIVFSTRGRLYEYASSV<br>RGTIERYKKACADTTNSGSISEANTQFYQQSNKLRK<br>DIKEIQKANRNMLGEGVESIQPKDLKKIEGNLERAIGK<br>IRTRKNELLFAEIELMQKREMELOANLYLRAKNFDM<br>VQIAENERATDTPHMNLMPPASASEYNHHQSMASHSF<br>DDVRSFIPVNLLEPNQHYSRQDPTALQLV |
| <i>GsAG2</i>   | LC022779 | <i>Gentiana scabra</i>    | MDSQNQEIESSNSRKSGRGKIEIKRIENKTNRQVTFCKR<br>RSGLLKKAYELSVLCDAEVALIVFSSSGRLYEYANNSA<br>KGTIERYKKACGDSTSAGSVSEANIQFYQQEANQLRK<br>NIRDIQSSNRHILGEGLDELFSKQIKNLEGRVEKGIARV<br>RSRKNELLA AEIELMKKREIELQANLYLRAKITENDQ<br>QRVQAEQQQMNFMPSADYQTNNNNIASEPNYQEVH<br>NFIPVNF LDHNQHYSSQDPTALQFV |
| <i>GsSTK1</i>  | LC022768 | <i>Gentiana scabra</i>    | MGRGKIEIKRIENNTNRQVTFCKRRNGLLKKAYELSVL<br>CDAEVALVVFSSRGRVY EYANNIRATIDRYRKATSD<br>VPTVFTTQEINAQFYQQESKLRQIQILQNSNRHLM<br>GEGLSALNVKELKQLETRLERGLSRIRSKKHEMILAEA<br>EYLQKREIQLEQENAWLKAKISEQEKLQHLSSMPPGQ<br>EYNEAMEAYFAQNMLQLNMMEGVPIYSLSSDKKSLH<br>LG                              |

**Table S3:** The sequences of primers used for semi-quantitative PCR and qRT-PCR analysis in carnation.

| Gene name         | Efficiency | Oligo Name          | Primer sequence (5'–3')   |
|-------------------|------------|---------------------|---------------------------|
| <i>DcaAGa</i>     | 98.9%      | <i>DcaAGa-F</i>     | CGAATCCGATCCAAAAAGAATG    |
|                   |            | <i>DcaAGa-R</i>     | TCGTACTCGCTGCTACCTCC      |
| <i>DcaAGb</i>     | 97.8%      | <i>DcaAGb-F</i>     | GCATTAGTAGAATCCGATCCAA    |
|                   |            | <i>DcaAGb-R</i>     | TCGTAGTACCACCACCCG        |
| <i>DcaAP1</i>     | 99.1%      | <i>DcaAP1-F</i>     | ACAAGGTGTTGGTGATGA        |
|                   |            | <i>DcaAP1-R</i>     | GTATTGGCGATTGGCTC         |
| <i>DcaAP2</i>     | 98.3%      | <i>DcaAP2-F</i>     | AGCCAAACACACTTACAATCAC    |
|                   |            | <i>DcaAP2-R</i>     | TCCCCCGTTGCTGCTAC         |
| <i>DcaSEP1</i>    | 99.6%      | <i>DcaSEP1-F</i>    | GGTGAAAGATAGTCAAATGAGGCAG |
|                   |            | <i>DcaSEP1-R</i>    | GTCAATGGGTTGGAAAAGAGGTT   |
| <i>DcaSEP3</i>    | 98.6%      | <i>DcaSEP3-F</i>    | ATCTTCGCAGTGAACGGACAA     |
|                   |            | <i>DcaSEP3-R</i>    | CCTGCTGATAACCGATTTGTAAG   |
| <i>DcaPI</i>      | 97.9%      | <i>DcaPI-F</i>      | GGAGGAGAATAATCAGCTTGTA    |
|                   |            | <i>DcaPI-R</i>      | GATGGAATCGGGTGCTGA        |
| <i>DcaAP3</i>     | 99.6%      | <i>DcaAP3-F</i>     | CTACAAAGAAAAAGGTGCGAAATGG |
|                   |            | <i>DcaAP3-R</i>     | GCAATCTGAGAGCGAGCAAACGAG  |
| <i>DcaGAPDH</i>   | 98.6%      | <i>DcaGAPDH-F</i>   | CGGAAAGTTGACTGGTATGGC     |
|                   |            | <i>DcaGAPDH-R</i>   | CATCCTCGGTGTAGCCAAAAT     |
| <i>Dcaβ-actin</i> | 97.6%      | <i>Dcaβ-actin-F</i> | AAACTTTCAACGCTCCTGCTATG   |
|                   |            | <i>Dcaβ-actin-R</i> | CTATCCCTTACTATTCTCGCTCA   |

**Table S4:** The sequences of primers used for semi-quantitative PCR and qRT-PCR in transgenic *Arabidopsis*.

| Gene Name      | Oligo Name        | Primer Sequence (5'-3')    |
|----------------|-------------------|----------------------------|
| <i>AtPI</i>    | <i>AtPI</i> -F    | AAGAGGATAGAGAACGCAAACA     |
|                | <i>AtPI</i> -R    | GAAGGACAACAGTAATCAATCA     |
| <i>AtAP3</i>   | <i>AtAP3</i> -F   | AGAGAACCAGACAAACAGACAAG    |
|                | <i>AtAP3</i> -R   | CTTCGTTGTGGTGTAGGGCTGA     |
| <i>AtAG</i>    | <i>AtAG</i> -F    | CTACGAGCAGCTTATGCCACCA     |
|                | <i>AtAG</i> -R    | GAGTAATGGTGATTGTTAGGTTGC   |
| <i>AtSTK</i>   | <i>AtSTK</i> -F   | TAGGATGGGAAGAGGAAAGATAGAA  |
|                | <i>AtSTK</i> -R   | TCTTATGTTGTTATTGGCGTATTCA  |
| <i>AtSEP1</i>  | <i>AtSEP1</i> -F  | CCTTATCTCAAGTGTCTGCG       |
|                | <i>AtSEP1</i> -R  | GAGAGGAGAACCAGAAGCGA       |
| <i>AtSEP2</i>  | <i>AtSEP2</i> -F  | GATTTAGCCGAGAACGGGAAGAT    |
|                | <i>AtSEP2</i> -R  | ACTCTCTATGTAATCCGTAAGCG    |
| <i>AtSEP3</i>  | <i>AtSEP3</i> -F  | GTATCAGGGGCAACAAGATGGAAT   |
|                | <i>AtSEP3</i> -R  | AAAGAGAGGGATTGATTAAGTGAGAA |
| <i>AtACT2</i>  | <i>AtACT2</i> -F  | GGCTCCTCTTAACCCAAAGGC      |
|                | <i>AtACT2</i> -R  | CACACCATCACCAGAATCCAG      |
| <i>AtACT11</i> | <i>AtACT11</i> -F | CCACATGCTATTCTGCGTTTGGACC  |
|                | <i>AtACT11</i> -R | CATCCCTTACGATTCACGCTCTGC   |
